# Supplementary material for: Disruption and inactivation of the PP2A complex promotes the proliferation and angiogenesis of hemangioma endothelial cells through activating AKT and ERK
Source: PubMed Central journal article supplement (PMC4694857; doi:10.18632/oncotarget.4705), 2015-07-27
Supplement: oncotarget-06-25660-s001.pdf [file oncotarget-06-25660-s001.pdf]

**SUPPLEMENTARY TABLE****Supplementary Table S1. Cloning and Genotyping primers used in this study****Cloning Primers**

|                    |                                                                                                                  |
|--------------------|------------------------------------------------------------------------------------------------------------------|
| Tie2 promoter      | Forward Primer<br>CATGGTACCGCGGAAGCTTACTAAGATCTAATGAAAATC<br>Reverse Primer<br>CATGTCGACTTCAACAACCTCACAACCTTTGCG |
| PyMT               | Forward Primer<br>CATCTCGAGAGCCTCACCACCATCATGGATAGAGTTCTGAGCAGAG<br>Reverse Primer<br>CATGCTAGCCTAGAAATGCCGGAACG |
| Junction fragment  | Forward Primer<br>GTGTAATTCTAGAGTCGGGGC<br>Reverse Primer<br>CGACGGATCCTTATCGATTTTACC                            |
| Tie2 enhancer      | Forward Primer<br>CATATCGATCTCGAGGTCCAGTATGGCTTC<br>Reverse Primer<br>CATGTCGACGTACCATTATTGTTTTACTTGGGAGG        |
| Genotyping Primers |                                                                                                                  |
| PyMT               | Forward Primer<br>CCCGAGATGTGCTGAACC<br>Reverse Primer<br>CGTGTAGTGGACTGTGGC                                     |
